# Supplementary material for: Preparation of hydrophobic hollow silica nanospheres with porous shells and their application in pollutant removal
Source: Royal Society of Chemistry journal article supplement (doi:10.1039/c2ra22113f), 2012-11-14
Supplement: c2ra22113f.pdf [file c2ra22113f.pdf]

Electronic Supplementary Information for

## **Preparation of hydrophobic hollow silica nanospheres with porous shells and their application in pollutant removal**

Song Shi,<sup>a,b</sup> Min Wang<sup>a</sup>, Chen Chen<sup>a</sup>, Fang Lu<sup>a</sup>, Xi Zheng<sup>a,b</sup>, Jin Gao<sup>a</sup> and Jie Xu<sup>\*a</sup>

<sup>a</sup> *Dalian National Laboratory for Clean Energy, State Key Laboratory of Catalysis, Dalian Institute of Chemical Physics, Chinese Academy of Sciences, Dalian, 116023, P. R. China. E-mail: [xujie@dicp.ac.cn](mailto:xujie@dicp.ac.cn); Fax: +86-411-84379245; Tel:*

*+86-411-84379245*

<sup>b</sup> *Graduate University of Chinese Academy of Sciences, Beijing, 100049, P. R. China*

\*Corresponding author: E-mail: [xujie@dicp.ac.cn](mailto:xujie@dicp.ac.cn)

Fig. S1 Size distribution of a, NSS b, NHS c, IBSS d, IBHS

Fig. S2 FT-IR for a, IBHS b, IBSS

Fig. S3 TGA for a, IBHS b, IBSS

Fig. S4 TEM images of a, PRSS, b, PRHS

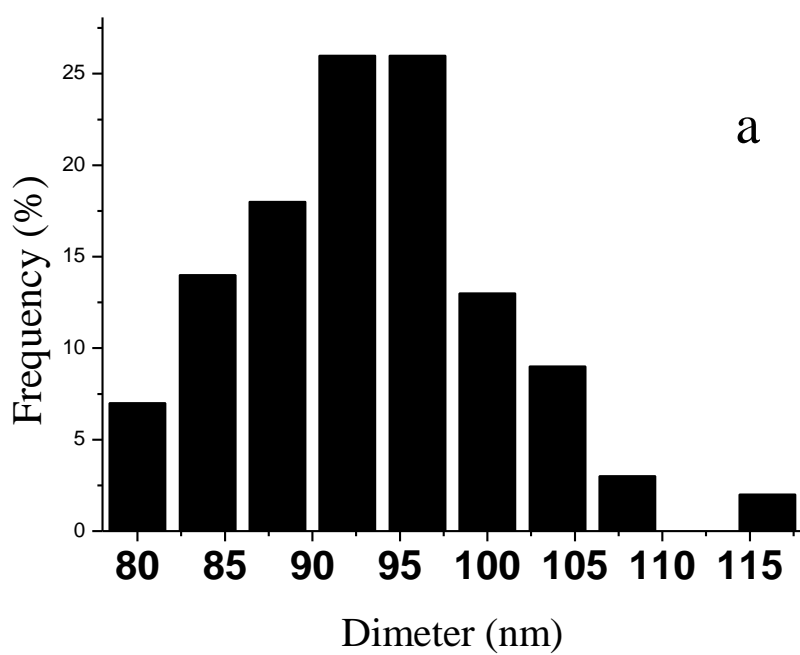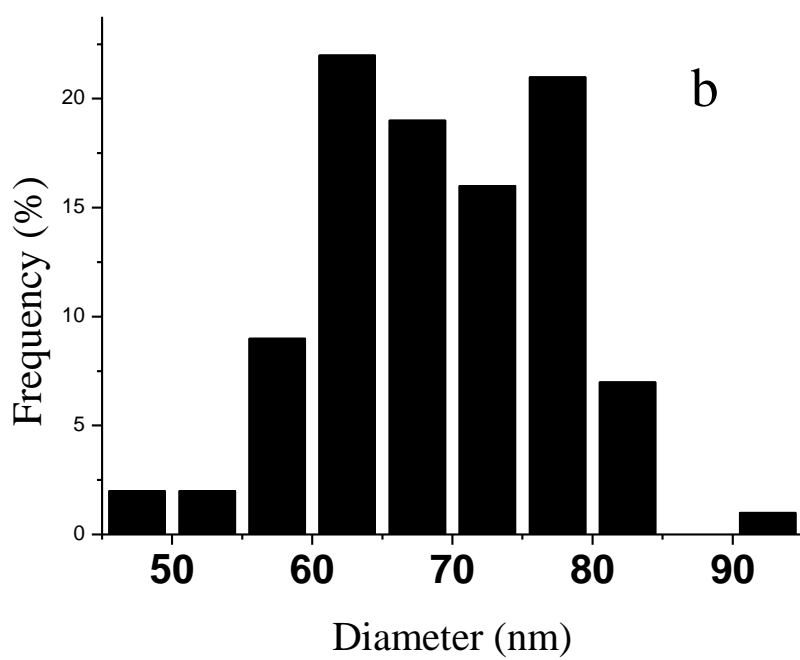

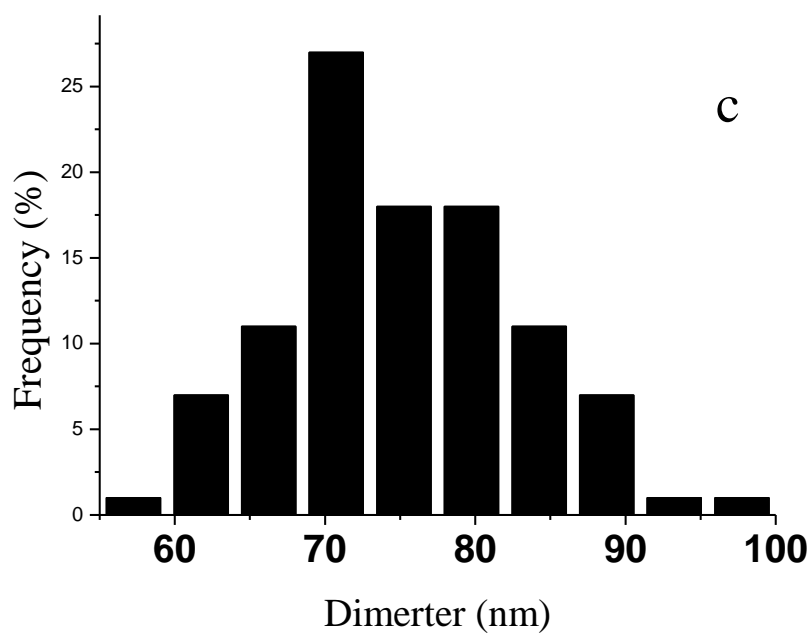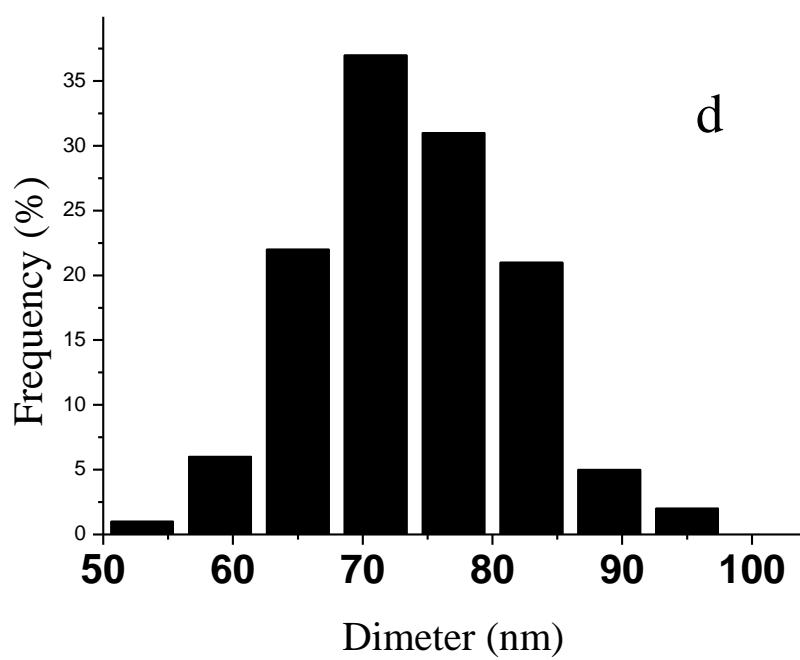

**Fig. S1** Size distribution of a, NSS b, NHS c, IBSS d, IBHS

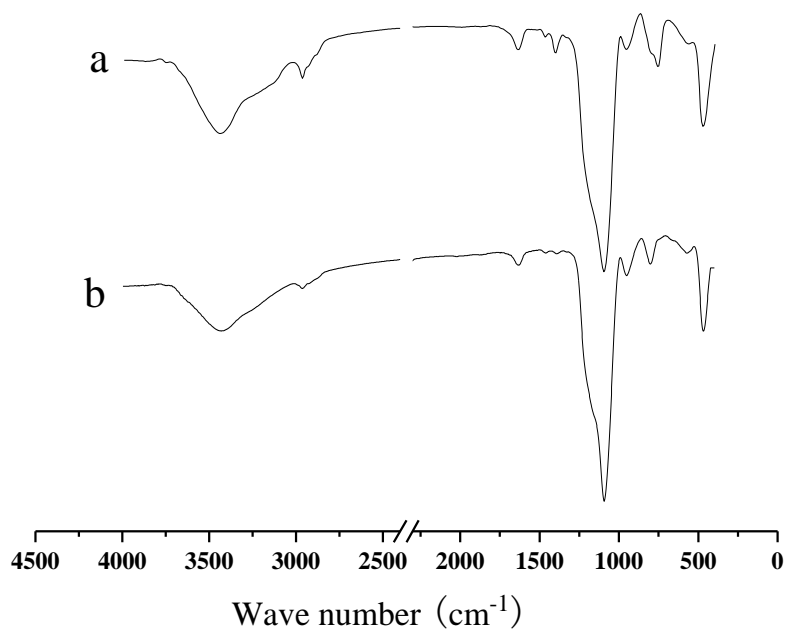

**Fig. S2** FT-IR for a, IBHS b, IBSS

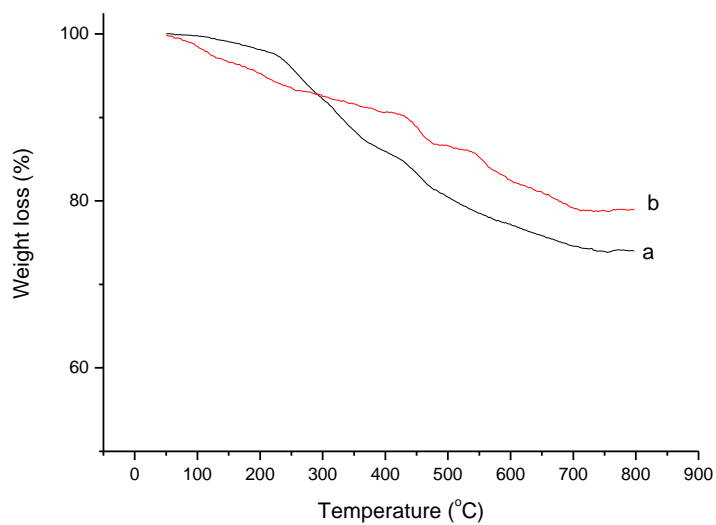

**Fig. S3** TGA for a, IBHS b, IBSS

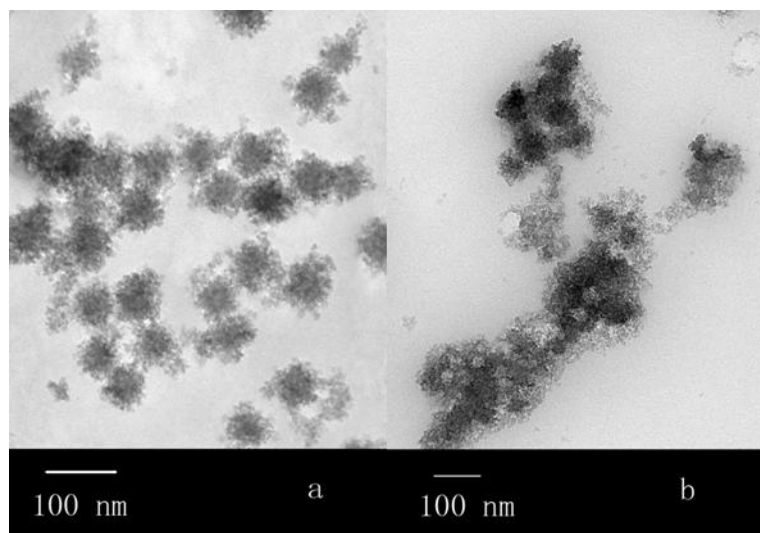

**Fig. S4** TEM images of a, PRSS, b, PRHS
